# Supplementary material for: Kink turn sRNA folding upon L7Ae binding using molecular dynamics simulations
Source: Royal Society of Chemistry journal article supplement (doi:10.1039/c3cp53145g), 2013-01-01
Supplement: c3cp53145g.pdf [file c3cp53145g.pdf]

**Table S1.** Detailed RMSD of Induced Fit (IF, RMSD between the bound structure and the most-similar apo-structure to this bound structure) and Conformational Selection (CS, average RMSD between the most-similar apo-structure and other apo-structures).

|                        | Complex | Most-similar Apo | IF RMSD (Å) | CS RMSD (Å) |
|------------------------|---------|------------------|-------------|-------------|
| <b>RNA (no tail)</b>   | 1       | 1                | 1.771       | 1.367       |
|                        | 2       | 10               | 1.498       | 1.366       |
|                        | 3       | 9                | 2.712       | 1.810       |
|                        | 4       | 10               | 1.880       | 1.366       |
|                        | 5       | 9                | 2.123       | 1.810       |
|                        | 6       | 1                | 1.738       | 1.367       |
|                        | 7       | 1                | 1.550       | 1.367       |
|                        | 8       | 9                | 1.776       | 1.810       |
|                        | 9       | 1                | 1.586       | 1.367       |
|                        | 10      | 1                | 1.502       | 1.367       |
| <b>RNA (with tail)</b> | 1       | 5                | 3.298       | 2.954       |
|                        | 2       | 10               | 2.570       | 3.461       |
|                        | 3       | 9                | 3.323       | 3.461       |
|                        | 4       | 10               | 2.367       | 2.719       |
|                        | 5       | 9                | 2.471       | 3.423       |
|                        | 6       | 1                | 2.113       | 2.954       |
|                        | 7       | 10               | 2.204       | 3.204       |
|                        | 8       | 1                | 2.612       | 2.719       |
|                        | 9       | 10               | 1.944       | 3.423       |
|                        | 10      | 1                | 1.994       | 2.954       |
| <b>Protein</b>         | 1       | 1                | 2.139       | 2.268       |
|                        | 2       | 9                | 2.207       | 2.486       |
|                        | 3       | 1                | 1.826       | 2.268       |
|                        | 4       | 1                | 1.798       | 2.268       |
|                        | 5       | 7                | 1.944       | 2.313       |
|                        | 6       | 4                | 1.863       | 2.380       |
|                        | 7       | 1                | 1.723       | 2.268       |
|                        | 8       | 7                | 1.815       | 2.313       |
|                        | 9       | 7                | 2.100       | 2.313       |
|                        | 10      | 7                | 2.397       | 2.313       |

**Table S2.** Detailed populations and standard deviations of all the interactions of population higher than 0.2.

| <b>H Bond</b>      | <b>Population</b> | <b><i>sd</i></b> | <b>Hydrophobic</b>   | <b>Population</b> | <b><i>sd</i></b> |
|--------------------|-------------------|------------------|----------------------|-------------------|------------------|
| 18RU_O2P_32THR_N   | 0.999             | 0.001            | 90VAL_17RG           | 0.963             | 0.080            |
| 18RU_O1P_93ALA_N   | 0.997             | 0.007            | 88ILE_17RG           | 0.847             | 0.164            |
| 34GLU_OE2_19RG_N1  | 0.990             | 0.023            | 90VAL_16RC           | 0.401             | 0.329            |
| 19RG_O6_34GLU_N    | 0.982             | 0.017            | 91PRO_16RC           | 0.275             | 0.378            |
| 18RU_O2P_32THR_OG1 | 0.981             | 0.024            |                      |                   |                  |
| 34GLU_OE2_6RG_O2'  | 0.967             | 0.086            |                      |                   |                  |
| 19RG_O6_33ASN_N    | 0.929             | 0.046            |                      |                   |                  |
| 17RG_N7_30LYS_NZ   | 0.858             | 0.284            |                      |                   |                  |
| 30LYS_NZ_6RG_O2'   | 0.856             | 0.242            |                      |                   |                  |
| 6RG_O2'_30LYS_NZ   | 0.856             | 0.242            | <b>Electrostatic</b> | <b>Population</b> | <b><i>sd</i></b> |
| 34GLU_OE2_19RG_N2  | 0.833             | 0.083            | 29LYS_6RG            | 1.000             | 0.000            |
| 7RA_O2P_30LYS_NZ   | 0.830             | 0.249            | 30LYS_7RA            | 1.000             | 0.000            |
| 5RU_O2P_41ARG_NH2  | 0.818             | 0.274            | 37LYS_4RC            | 1.000             | 0.000            |
| 4RC_O1P_41ARG_NH2  | 0.773             | 0.153            | 37LYS_5RU            | 1.000             | 0.000            |
| 6RG_O6_33ASN_ND2   | 0.719             | 0.121            | 79LYS_18RU           | 1.000             | 0.000            |
| 18RU_O4_54ASP_N    | 0.715             | 0.180            | 30LYS_18RU           | 1.000             | 0.000            |
| 17RG_O6_30LYS_NZ   | 0.713             | 0.305            | 29LYS_5RU            | 0.999             | 0.002            |
| 5RU_O2P_41ARG_NH1  | 0.672             | 0.224            | 41ARG_5RU            | 0.998             | 0.005            |
| 5RU_O1P_41ARG_NH1  | 0.670             | 0.199            | 41ARG_4RC            | 0.998             | 0.005            |
| 6RG_O3'_30LYS_NZ   | 0.669             | 0.258            | 37LYS_3RU            | 0.993             | 0.010            |
| 19RG_O6_32THR_N    | 0.574             | 0.152            | 79LYS_17RG           | 0.959             | 0.036            |
| 34GLU_OE1_6RG_O2'  | 0.541             | 0.169            | 29LYS_7RA            | 0.957             | 0.121            |
| 18RU_O4_79LYS_NZ   | 0.533             | 0.160            | 30LYS_6RG            | 0.938             | 0.134            |
| 6RG_O6_37LYS_NZ    | 0.511             | 0.331            | 41ARG_6RG            | 0.925             | 0.188            |
| 4RC_O2P_37LYS_NZ   | 0.468             | 0.254            | 27LYS_6RG            | 0.855             | 0.114            |
| 6RG_O2P_29LYS_NZ   | 0.398             | 0.190            | 37LYS_6RG            | 0.841             | 0.232            |
| 4RC_O5'_41ARG_NH2  | 0.378             | 0.154            | 41ARG_3RU            | 0.621             | 0.126            |
| 54ASP_O_18RU_N3    | 0.273             | 0.367            | 30LYS_8RC            | 0.575             | 0.194            |
| 4RC_O3'_41ARG_NH2  | 0.202             | 0.104            | 27LYS_7RA            | 0.371             | 0.203            |

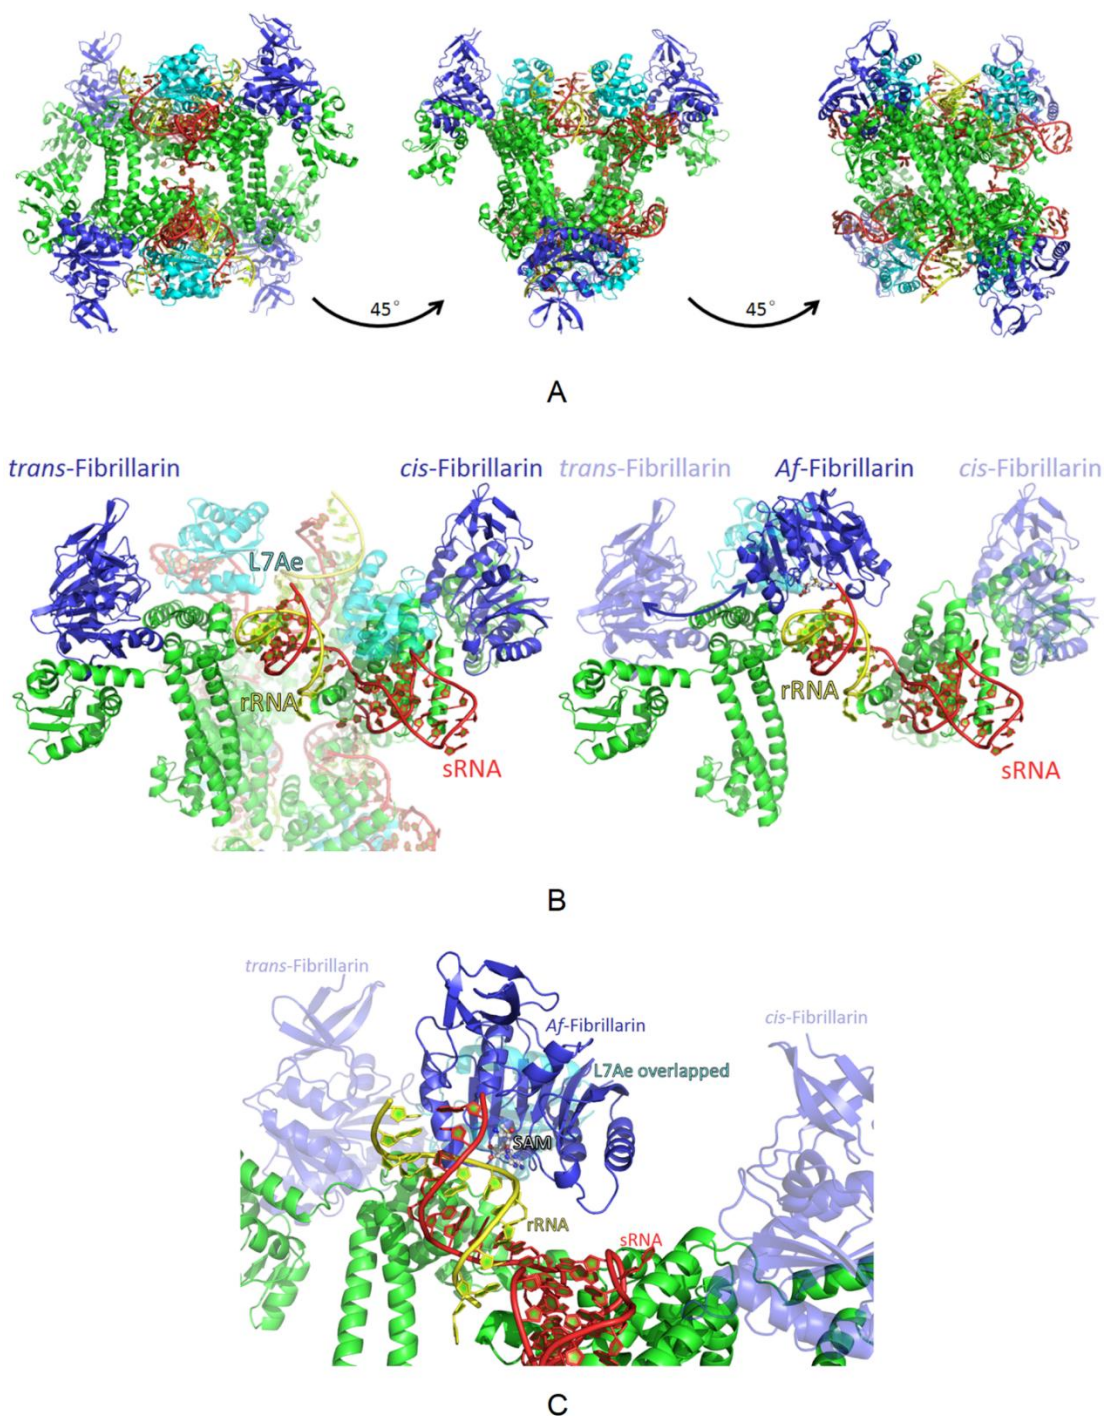

**Figure S1.** Structures of diRNP and cross-RNP models. (A) The diRNP model was manually constructed based on previous EM results and Xue's docking. (B and C) In diRNP model, fibrillarins (blue) has "*cis*" position and "*trans*" position, which are both far away from substrate rRNA (yellow). The transition of fibrillarins from "*trans*" position to "*Af*" position enables the methylation catalyse (Methyl donor, SAM in ball-stick representation, is very close to substrate rRNA). However, L7Ae (cyan) is overlapped by fibrillarins, indicating it also has a reposition. The reposition of fibrillarins might be under the hinge motion of sRNA, as well as L7Ae. Additionally, K-turn sRNA is in red cartoon representation.

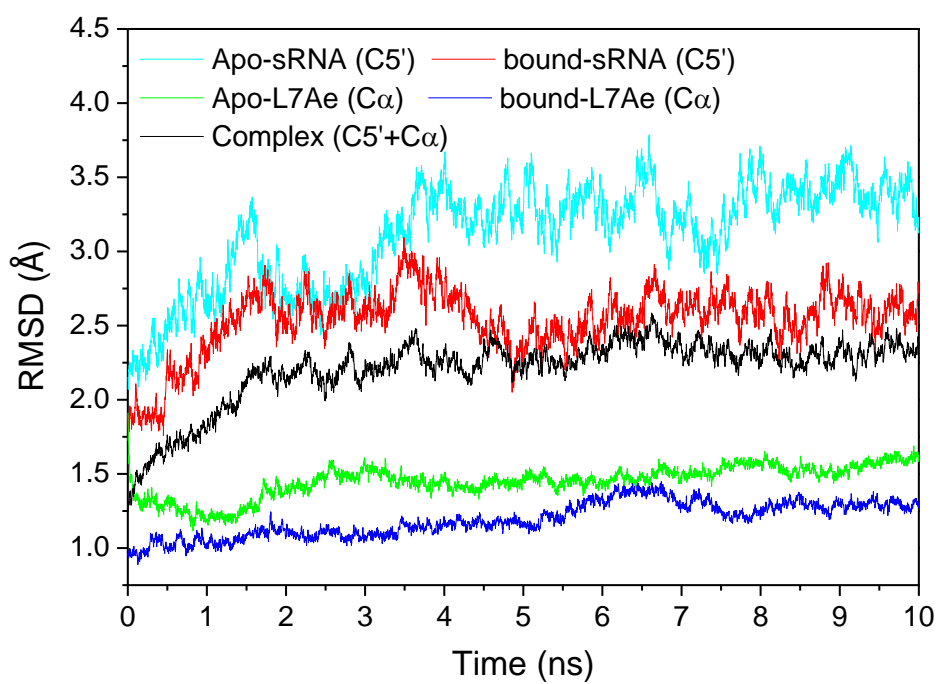

**Figure S1.** RMSD to the start structure at 298K for bound (black) and apo-sRNA (red) and apo-L7Ae (blue).

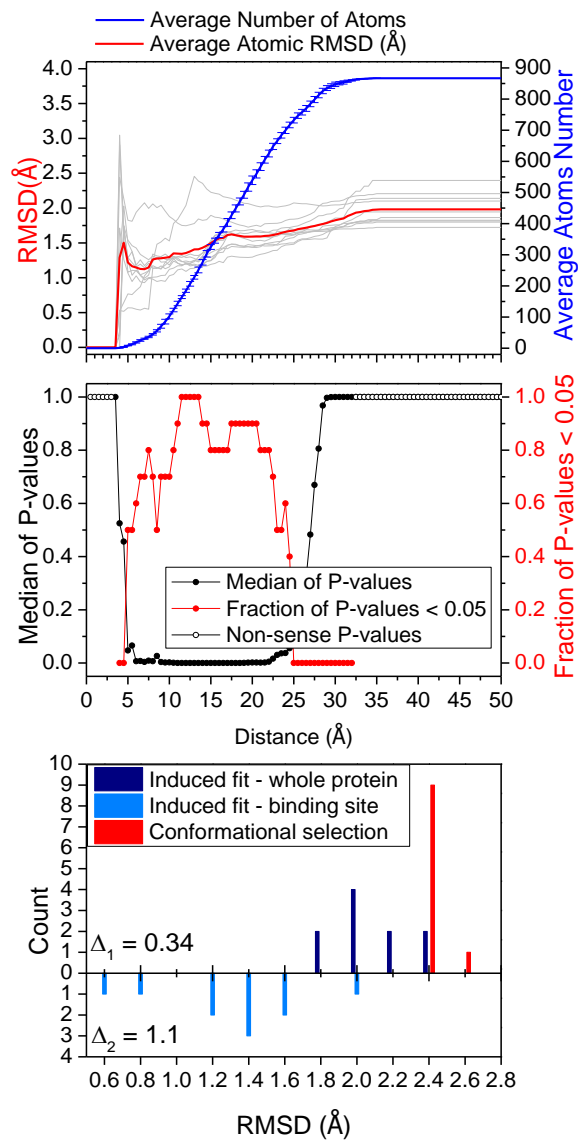

**Figure S2.** Binding mechanism evaluation for L7Ae binding.

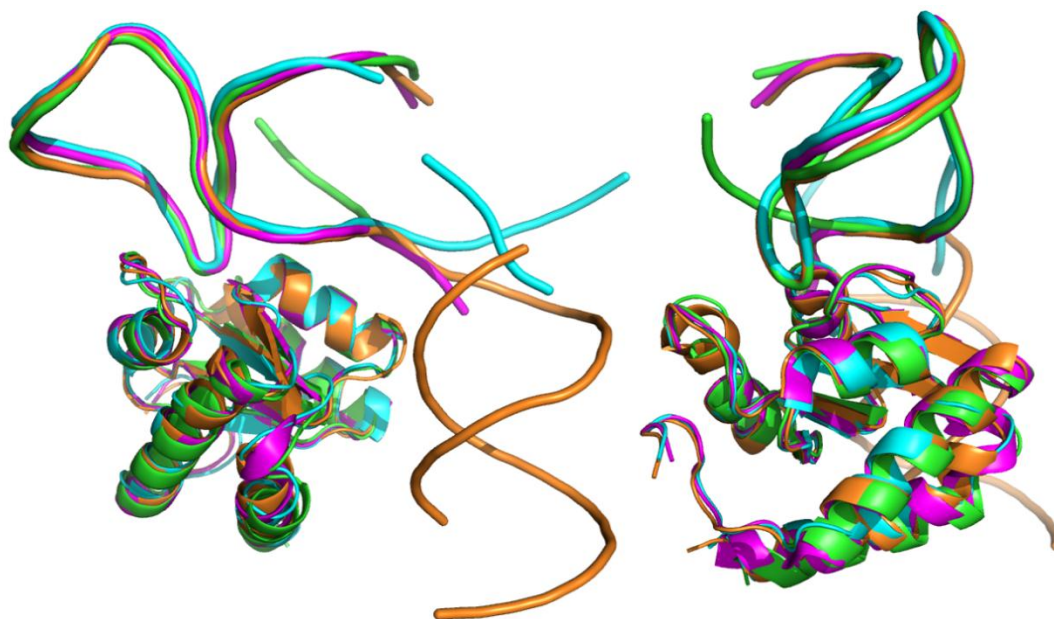

**Figure S3.** Alignment of 1RLG (green), 3NMU (orange), 3NVK (cyan) and 3NVI (magenta), basing on all Ca atoms, shown in front-sight and lateral-sight.

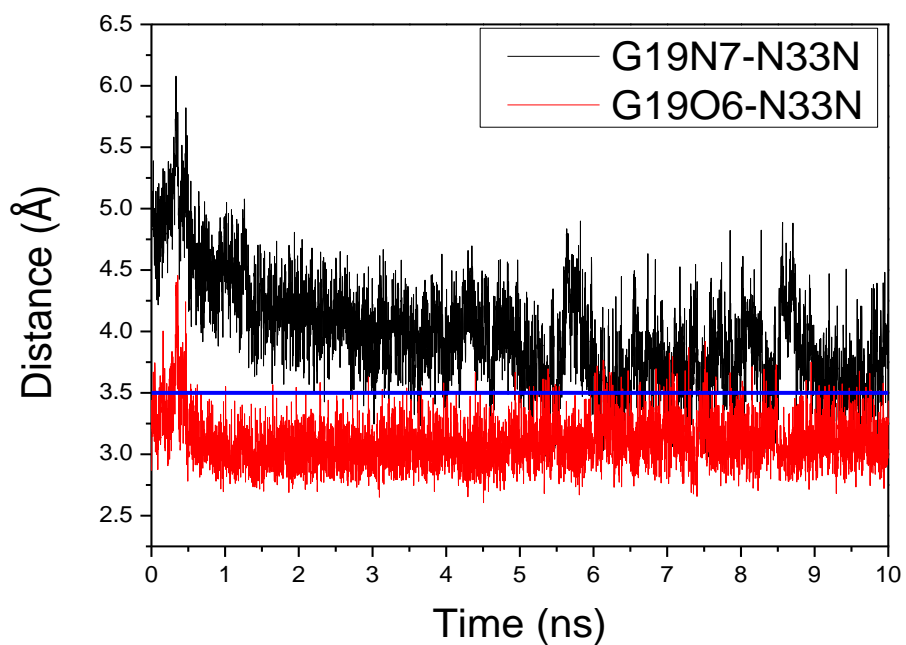

**Figure S4.** Distances vs. time of two hydrogen bonds both between G19 and N33, red line for G19O6-N33N, black for G19N7-N33N, and blue line for the hydrogen bond threshold.

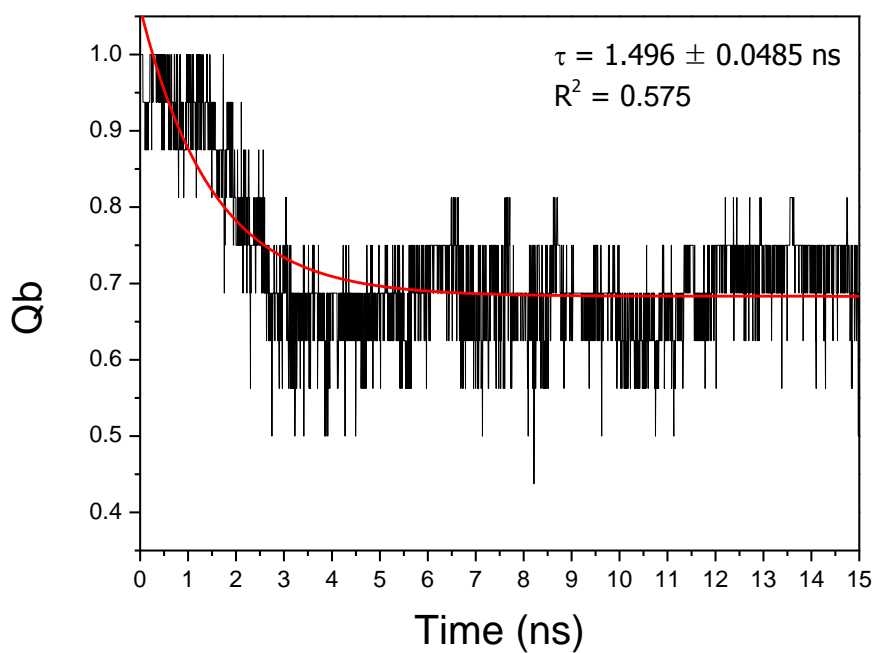

**Figure S5.** Time evolution of Qb for U18G mutant complex. Fitting of first order exponential function was shown in red line. Unfolding half time and correlation coefficient were also listed.



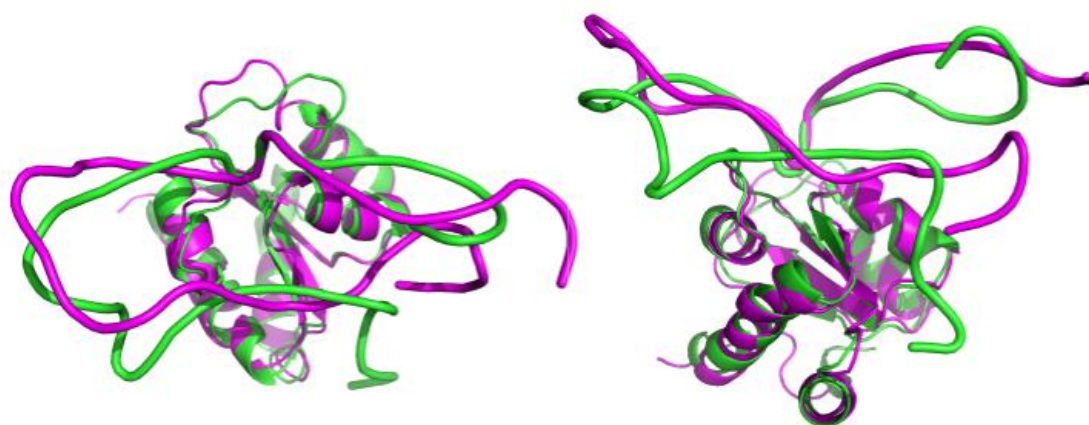

**Figure S6.** Head view and lateral view of alignment of average structure in transition state (TS) ensembles. Green for U18G mutant bound sRNA and magenta for WT complex.
